# Supplementary material for: Novel uranyl(vi) complexes incorporating propylene-bridged salen-type N2O2-ligands: a structural and computational approach
Source: Royal Society of Chemistry journal article supplement (doi:10.1039/c4dt02112f), 2014-10-01
Supplement: c4dt02112f1.pdf [file c4dt02112f1.pdf]

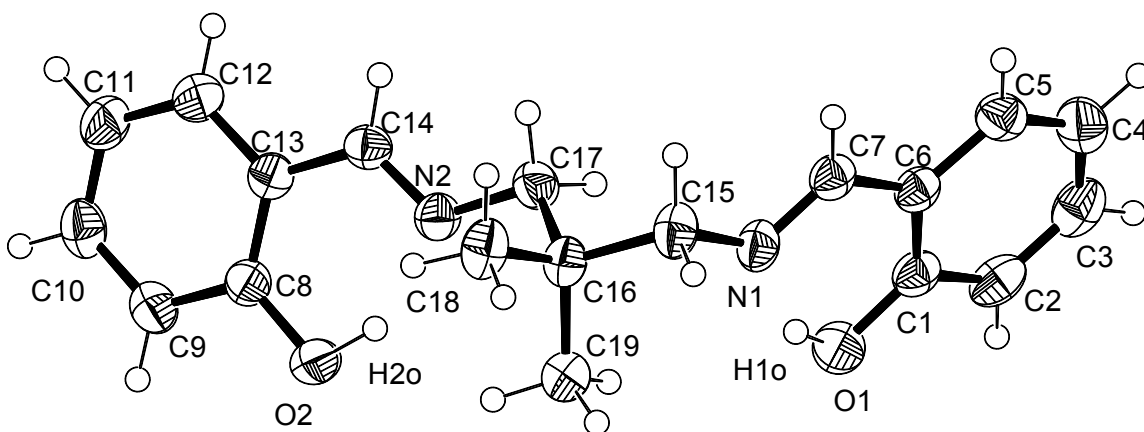

Fig 1S: C-bound hydrogen atoms were refined in idealized positions (riding model), the OH hydrogen atoms were located as residual electron density peaks and refined isotropically without any restraints.

% T

Wave Number

Fig 2S: IR Spectra of ligand, H<sub>2</sub>L and its uranyl complex

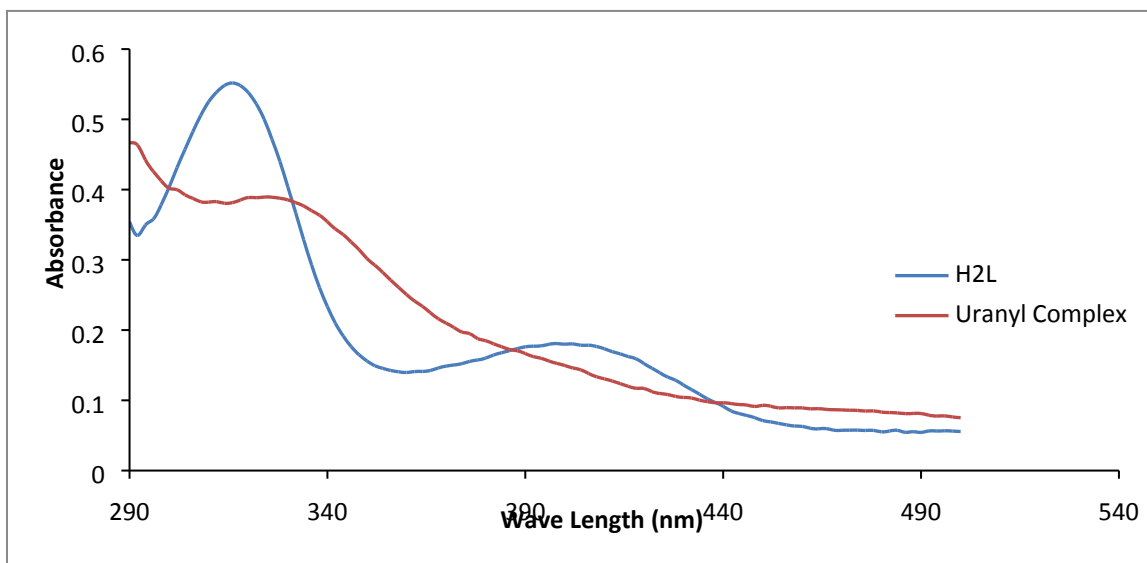

Fig 3S: Absorption spectra of ligand, H<sub>2</sub>L and its corresponding uranyl complex

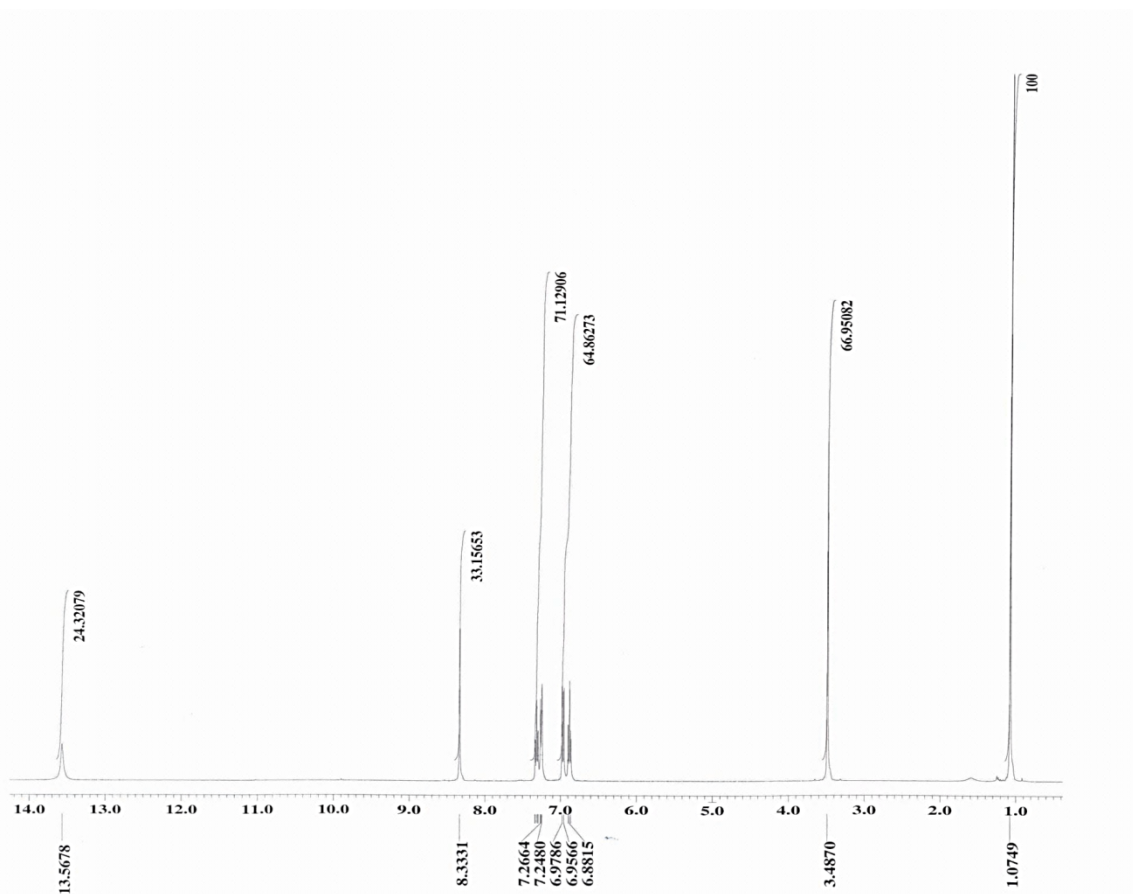

Fig 4S: <sup>1</sup>H NMR of ligand, H<sub>2</sub>L

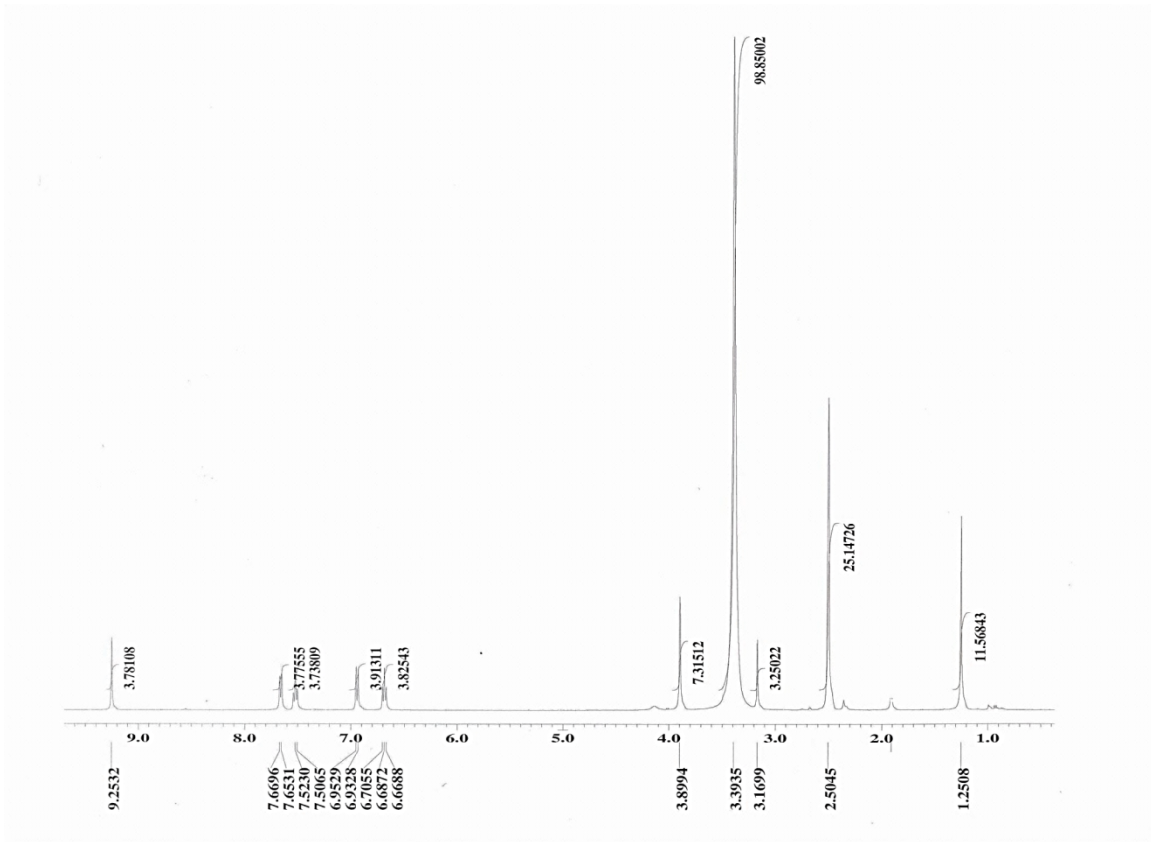

Fig 5S:  $^1\text{H}$  NMR spectrum of Uranyl Complex

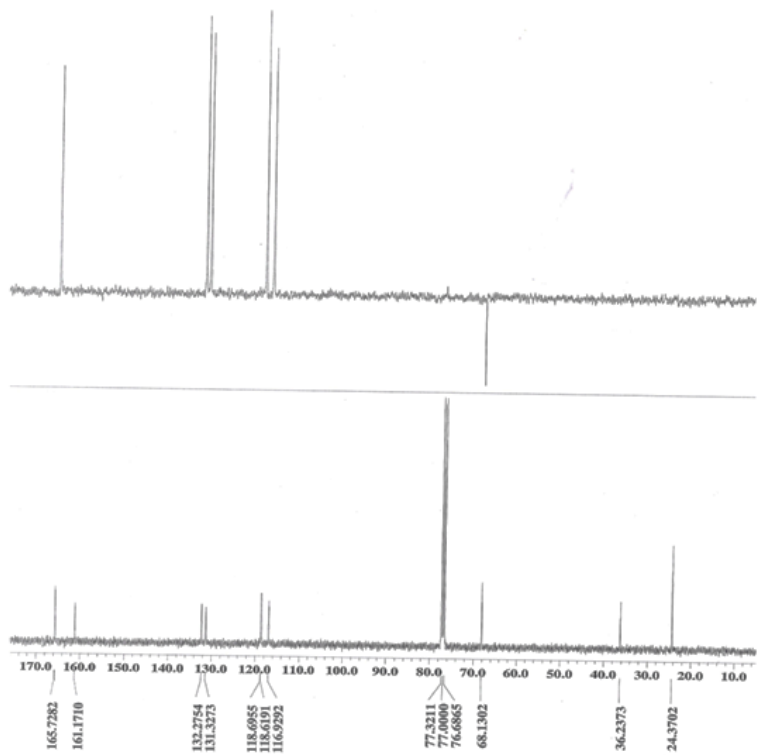

Fig 6S: DEPT-135 NMR of Ligand, H<sub>2</sub>L

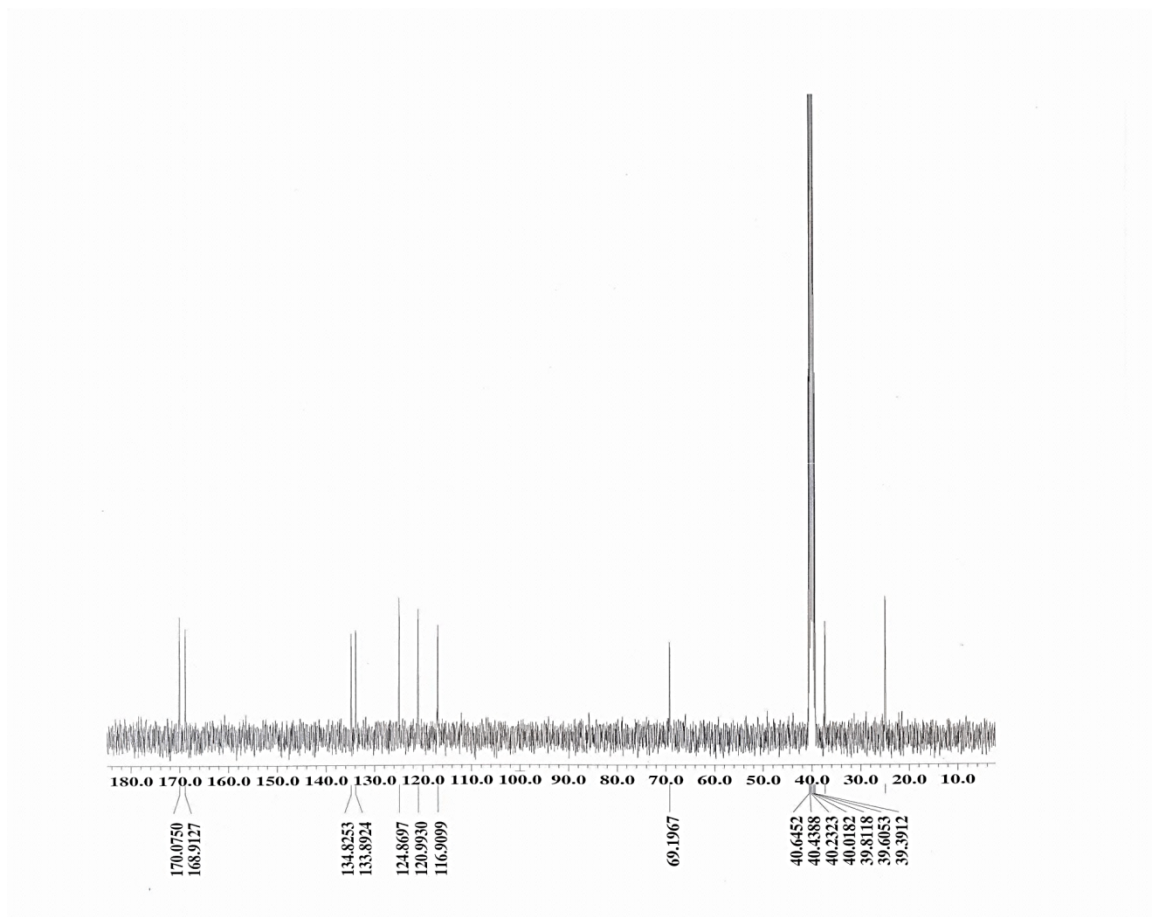

Fig 7S:  $^{13}\text{C}$  NMR of Uranyl complex

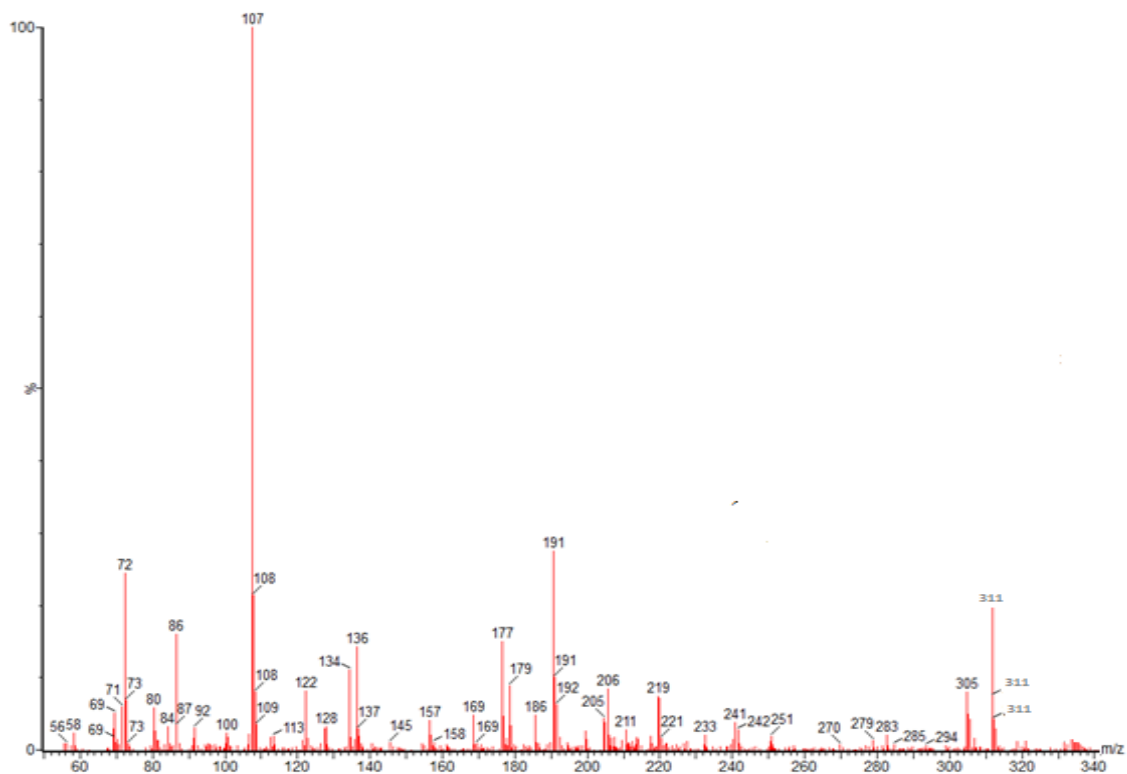

Fig 8S: ESI-MS Spectrum of ligand, H<sub>2</sub>L



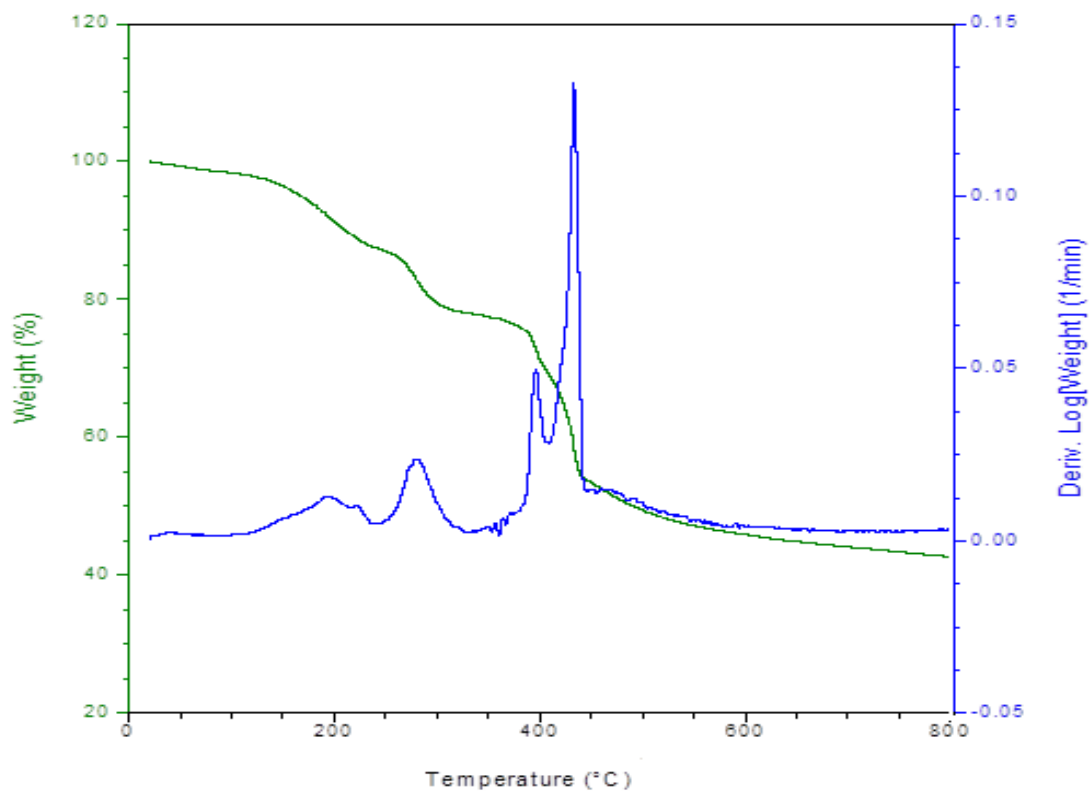

Fig 9S: TGA/DTA of Uranyl Complex

Table 1S. Crystal data and structure refinement for ligand, H<sub>2</sub>L.

|                                   |                                             |
|-----------------------------------|---------------------------------------------|
| Empirical formula                 | C19 H22 N2 O2                               |
| Formula weight                    | 310.39                                      |
| Temperature                       | 200(2) K                                    |
| Wavelength                        | 0.71073 Å                                   |
| Crystal system, space group       | Orthorhombic, P212121                       |
| Unit cell dimensions              | a = 6.1281(3) Å    alpha = 90 deg.          |
| b = 15.9681(10) Å                 | beta = 90 deg.                              |
| c = 17.3110(8) Å                  | gamma = 90 deg.                             |
| Volume                            | 1693.95(16) Å <sup>3</sup>                  |
| Z, Calculated density             | 4, 1.217 Mg/m <sup>3</sup>                  |
| Absorption coefficient            | 0.079 mm <sup>-1</sup>                      |
| F(000)                            | 664                                         |
| Crystal size                      | 0.40 x 0.25 x 0.04 mm                       |
| Theta range for data collection   | 2.55 to 27.00 deg.                          |
| Limiting indices                  | -7<=h<=7, -20<=k<=20, 20<=l<=22             |
| Reflections collected / unique    | 18886 / 3681 [R(int) = 0.0439]              |
| Completeness to theta = 27.00     | 99.8 %                                      |
| Absorption correction             | None                                        |
| Refinement method                 | Full-matrix least-squares on F <sup>2</sup> |
| Data / restraints / parameters    | 3681 / 0 / 218                              |
| Goodness-of-fit on F <sup>2</sup> | 1.067                                       |
| Final R indices [I>2sigma(I)]     | R1 = 0.0311, wR2 = 0.0772                   |
| R indices (all data)              | R1 = 0.0367, wR2 = 0.0799                   |
| Largest diff. peak and hole       | 0.184 and -0.110 e.Å <sup>-3</sup>          |

Table 2S. Bond lengths [Å] and angles [deg] for ligand, H<sub>2</sub>L.

---

|                  |            |                   |            |
|------------------|------------|-------------------|------------|
| O(1)-C(1)        | 1.3524(17) | C(5)-C(6)         | 1.4008(18) |
| O(1)-H(10)       | 0.91(2)    | C(6)-C(7)         | 1.4626(17) |
| O(2)-C(8)        | 1.3512(16) | C(8)-C(9)         | 1.3961(19) |
| O(2)-H(20)       | 0.96(2)    | C(8)-C(13)        | 1.4086(18) |
| N(1)-C(7)        | 1.2788(17) | C(9)-C(10)        | 1.379(2)   |
| N(1)-C(15)       | 1.4616(16) | C(10)-C(11)       | 1.385(2)   |
| N(2)-C(14)       | 1.2747(17) | C(11)-C(12)       | 1.382(2)   |
| N(2)-C(17)       | 1.4556(16) | C(12)-C(13)       | 1.3984(18) |
| C(1)-C(2)        | 1.3968(19) | C(13)-C(14)       | 1.4588(17) |
| C(1)-C(6)        | 1.4094(18) | C(15)-C(16)       | 1.5364(18) |
| C(2)-C(3)        | 1.374(2)   | C(16)-C(19)       | 1.530(2)   |
| C(3)-C(4)        | 1.385(2)   | C(16)-C(18)       | 1.5353(17) |
| C(4)-C(5)        | 1.380(2)   | C(16)-C(17)       | 1.5374(17) |
| <hr/>            |            |                   |            |
| C(1)-O(1)-H(10)  | 106.3(12)  | C(9)-C(8)-C(13)   | 119.54(12) |
| C(8)-O(2)-H(20)  | 106.3(13)  | C(10)-C(9)-C(8)   | 120.53(13) |
| C(7)-N(1)-C(15)  | 119.36(12) | C(9)-C(10)-C(11)  | 120.50(13) |
| C(14)-N(2)-C(17) | 120.03(11) | C(12)-C(11)-C(10) | 119.53(13) |
| O(1)-C(1)-C(2)   | 119.14(12) | C(11)-C(12)-C(13) | 121.33(14) |
| O(1)-C(1)-C(6)   | 121.39(12) | C(12)-C(13)-C(8)  | 118.58(12) |
| C(2)-C(1)-C(6)   | 119.47(13) | C(12)-C(13)-C(14) | 120.19(12) |
| C(3)-C(2)-C(1)   | 120.41(14) | C(8)-C(13)-C(14)  | 121.24(11) |
| C(2)-C(3)-C(4)   | 120.96(13) | N(2)-C(14)-C(13)  | 120.99(12) |
| C(5)-C(4)-C(3)   | 119.22(14) | N(1)-C(15)-C(16)  | 111.98(11) |
| C(4)-C(5)-C(6)   | 121.37(14) | C(19)-C(16)-C(18) | 110.18(12) |
| C(5)-C(6)-C(1)   | 118.55(12) | C(19)-C(16)-C(15) | 110.10(11) |
| C(5)-C(6)-C(7)   | 119.94(12) | C(18)-C(16)-C(15) | 108.55(11) |
| C(1)-C(6)-C(7)   | 121.51(12) | C(19)-C(16)-C(17) | 110.81(11) |
| N(1)-C(7)-C(6)   | 121.29(12) | C(18)-C(16)-C(17) | 109.27(11) |
| O(2)-C(8)-C(9)   | 119.26(12) | C(15)-C(16)-C(17) | 107.88(10) |
| O(2)-C(8)-C(13)  | 121.21(12) | N(2)-C(17)-C(16)  | 111.69(10) |

---

Table 3S. Torsion angles [deg] for Uranyl complex.

---

|                      |           |
|----------------------|-----------|
| O(4)-U(1)-O(1)-C(1)  | 36.7(3)   |
| O(3)-U(1)-O(1)-C(1)  | -142.1(3) |
| O(2)-U(1)-O(1)-C(1)  | 116.9(3)  |
| O(5)-U(1)-O(1)-C(1)  | 131.3(3)  |
| N(2)-U(1)-O(1)-C(1)  | -44.7(3)  |
| N(1)-U(1)-O(1)-C(1)  | -55.9(3)  |
| O(4)-U(1)-O(2)-C(8)  | -140.5(3) |
| O(3)-U(1)-O(2)-C(8)  | 37.7(3)   |
| O(1)-U(1)-O(2)-C(8)  | 139.5(3)  |
| O(5)-U(1)-O(2)-C(8)  | 124.9(3)  |
| N(2)-U(1)-O(2)-C(8)  | -53.0(3)  |
| N(1)-U(1)-O(2)-C(8)  | -50.9(3)  |
| O(4)-U(1)-O(5)-C(20) | -153.7(3) |
| O(3)-U(1)-O(5)-C(20) | 25.0(3)   |
| O(1)-U(1)-O(5)-C(20) | 120.3(3)  |
| O(2)-U(1)-O(5)-C(20) | -67.2(2)  |
| N(2)-U(1)-O(5)-C(20) | -64.0(3)  |
| N(1)-U(1)-O(5)-C(20) | 107.9(3)  |
| O(4)-U(1)-N(1)-C(7)  | -60.7(3)  |
| O(3)-U(1)-N(1)-C(7)  | 121.3(3)  |
| O(1)-U(1)-N(1)-C(7)  | 25.6(2)   |
| O(2)-U(1)-N(1)-C(7)  | -148.9(2) |
| O(5)-U(1)-N(1)-C(7)  | 38.4(3)   |
| N(2)-U(1)-N(1)-C(7)  | -146.8(3) |
| O(4)-U(1)-N(1)-C(15) | 122.6(2)  |
| O(3)-U(1)-N(1)-C(15) | -55.4(2)  |

---

Table 4S. The calculated lowest-lying transitions of [UO<sub>2</sub>L(CH<sub>3</sub>OH)] complex obtained using different functionals

|        | PBE1PBE | B3LYP | B3P86 | CAM-B3LYP | M05   | M06   | M06-L | TPSSLYP1W | M11-L | Exp/nm |
|--------|---------|-------|-------|-----------|-------|-------|-------|-----------|-------|--------|
| Peak 1 | 452.2   | 476.5 | 501.6 | 396.1     | 481.0 | 491.8 | 682.4 | 693.3     | 838.3 | 470    |
| Peak 2 | 327.1   | 359.1 | 330.6 | 310.5     | 330.4 | 348.5 | 478.7 | 492.7     | 533.2 | 400    |
| Peak 3 | 326.0   | 357.5 | 328.7 | 304.6     | 329.2 | 332.8 | 459.3 | 471.6     | 525.4 | 400    |

Table 5S. Second order perturbation interactions obtained for [UO<sub>2</sub>L(CH<sub>3</sub>OH)] complex from NBO calculations

| Donor (i)       | Acceptor (j)      | E(2) (kJ mol <sup>-1</sup> ) |
|-----------------|-------------------|------------------------------|
| n <sub>O5</sub> | n* <sub>U1</sub>  | 96.24                        |
| n <sub>O4</sub> | n* <sub>U1</sub>  | 81.59                        |
| n <sub>N8</sub> | n* <sub>U1</sub>  | 37.83                        |
| n <sub>O4</sub> | n* <sub>U1</sub>  | 35.25                        |
| $\pi_{U1-O5}$   | $\pi^*_{U1-O4}$   | 23.37                        |
| $\pi_{C27-C29}$ | $\pi^*_{C23-C25}$ | 21.97                        |
